# Supplementary material
Source: bioRxiv or medRxiv preprint supplement (https://medrxiv.org/highwire/filestream/79878/field_highwire_adjunct_files/0/2020.05.04.20091017-1.pdf)
Supplement: Supplementary file [file 2020.05.04.20091017-1.pdf]

## **Supplementary file 1: Descriptions of the used questionnaires**

### *The Short Warwick-Edinburgh Mental Well-being Scale (SWEMWBS)*

The SWEMWBS is a short version of the Warwick–Edinburgh Mental Wellbeing Scale (WEMWBS). The WEMWBS was developed to enable the monitoring of mental wellbeing in the general population and in response to projects, programs and policies focusing in mental wellbeing. The SWEMWBS uses seven of the WEMWBS’s 14 statements about thoughts and feelings, which relate more to functioning than feelings, suggesting an ability to detect clinically meaningful change.<sup>25 26</sup> The seven statements are positively worded with five response categories from ‘none of the time (score 1)’ to ‘all of the time (score 5)’. The SWEMWBS has been recently validated for the general population and is scored by first summing the scores for each of the seven items, which are scored from 1 to 5.<sup>16</sup> The total raw scores are then transformed into metric scores using the SWEMWBS conversion table. Total scores range from 7 to 35 with higher scores indicate higher positive mental wellbeing. As the idea of wellbeing is fairly new, it was suggested further interpretation can be made depending on the study design. In this study, we considered that scores between 7-13 reflect very low positive mental wellbeing, 14-20 reflect low positive mental wellbeing, 21-27 reflect medium positive mental wellbeing, and 28-35 reflect high positive mental wellbeing.

### *Short Mood and Feelings Questionnaire (SMFQ)*

The SMFQ is a short version of the Mood and Feelings Questionnaire (MFQ) developed in 1987.<sup>27</sup> The SMFQ was developed in response to the need for a brief depression measure to reduce participant burden.<sup>28</sup>

The SMFQ is suggested as a brief screening tool for depression based on thirteen of the MFQ’s 33 statements about how the subject has been feeling or acting recently.<sup>17</sup> The MFQ is scored by

summing together the point values of responses for each item ("not true" = 0 points; "sometimes true" = 1 point; "true" = 2 points), with higher scores on the SMFQ suggest more severe depressive symptoms. Scores on SMFQ range from 0 to 26; a total score of 12 or higher may indicate the presence of depression.<sup>17</sup>

#### *Short Social Participation Questionnaire-Lockdowns (SSPQL)*

The present Short Social Participation Questionnaire-Lockdowns (SSPQ-L) is a crisis-oriented short modified questionnaire to assess diet behavior before and during a lockdown period. The SDBQ-L is based on the eighteen items of the SPQ. The original SPQ items aim to ask respondents to indicate how regularly they had undertaken each activity in the last 12 months. From questions 1 to 12, participant could choose one of the six response categories: "Never", "Rarely", "A few times a year", "Monthly", "A few times a month", and "Once a week or more". The remaining four items requested a binary "Yes" or "No" response regarding participation in community groups in the last 12 months.<sup>29</sup> Given that we are assessing social participation before and during the home confinement, which is a short period (days to months), we adapted the response categories and shortened the number of questionnaires by combining similar questions (e.g., Q1 and 2; Q2 and Q3; Q12 and Q14), while adding one more question about the use of phone calls for communication. Accordingly, the final SSPQ-L includes 14 items with five response categories (i.e., "Never"=1 point; "Rarely"=2 points; "Sometimes"=3 points; "Often"=4 points and "All times"=5 points) for the 10 first items and "Yes"=5 points / "No"=1 point response categories for the four remaining items. Total scores of this questionnaire correspond to the sum of the scored points in the 14 questions. The total score for the SSPQ-L is from "14" to "70", where "14" indicate that participant has "never" being socially active; a score between "15" and "28" indicate that participant has "rarely" being socially active, a score between "29" and "42" indicate that participant is "sometimes" socially active, a score between "43" and "56" indicate that participant

is “often” socially active, and a score between “57” and “70” indicate that participant is at “all times” socially active.

### ***International Physical Activity Questionnaire Short Form (IPAQ-SF)***

According to the official IPAQ-SF guidelines, data from the IPAQ-SF are summed within each item (i.e., vigorous intensity, moderate intensity, and walking) to estimate the total amount of time spent engaged in physical activity per week.<sup>18 19</sup> In the present study, we report the total score reflecting the number of days per week of total physical activity (sum of performed vigorous, moderate and walking activity).

### ***Short Diet Behavior Questionnaire-Lockdowns***

The present Short Diet Behavior Questionnaire-Lockdowns (SDBQ-L) is a crisis-oriented short questionnaire newly developed to assess diet behavior before and during the lockdown period. The SDBQ-L has 5 questions related to “unhealthy food”, “eating out of control”, “snacks between meals”, “binge alcohol”, and “number of meals/day” in parts referring to Nutritional questionnaire, Swiss society of nutrition (doi/10.1371/journal.pone.0143293.s003). The response choices and their designated point values are as follows: "Never" = 0 points; "Sometimes" = 1 point; "Most of the times" = 2 points; "Always" = 3 points. These choices and points are applied for the first four questions. The choices and the designed points for the fifth question is as follows: “1-2” = 1 point; “3” = 0 point; “4” = 1 point; “5” = 2 points; “>5” = 3 points. Total score of this questionnaire correspond to the sum of the scored points in the 5 questions. The total score for the SDBQ-L is from “0” to “15”, where “0” designates no healthy diet behavior and “15” designates a severely unhealthy diet.

### ***The Pittsburgh sleep quality index (PSQI)***

The Pittsburgh Sleep Quality Index (PSQI) was used to assess subjective sleep quality over the previous month.<sup>20</sup> The PSQI has 19 questions collected into seven components: sleep quality, sleep latency, sleep duration, sleep efficiency, sleep disturbances, the use of sleeping medications, and daytime dysfunction. Each component is weighted equally on a 0-3 scale. The total score for the PSQI ranges from “0” to “21”, where “0” designates no trouble and “21” designates severe problems in all areas. A PSQI total score >5 is indicative of poor sleep.<sup>20</sup>

#### *The Short Technology-use Questionnaire-Lockdowns*

The present Short Technology-use Questionnaire-Lockdowns (STuQL) is a crisis-oriented short questionnaire newly developed to assess technology-use behavior before and during the lockdown period. The SDBQ-L has 3 questions related to technology-use behavior for “social participation”, “diet” and “physical activity” purpose. The response choices and their designated point values are as follows: "Never" = 0 points; “Rarely”=1 point; “Sometimes” = 2 points; "Often" = 3 points; "All times" = 4 points. Total score of this questionnaire corresponds to the sum of the scored points in the 3 questions. The total score for the SDBQ-L ranges from “0” to “12”, where “0” designates the absence of digital-use behavior and 12 designates that the subject extensively utilizing digital solutions (i.e., a score between: 1-3 indicate that participant is “rarely” using technology, 4-6 indicate that participant is “sometimes” using technology, 7-9 indicate that participant is “often” using technology, and 10-12 indicate that participant is using technology at “All times”).

#### *Key question about the need of psychosocial support.*

This is a newly crisis-oriented question that has been add to the ECLB-COVID19 survey to directly monitor the psychosocial need of people during the home confinement period compared to before the crisis. Five response categories are available for this question “Never”; “Rarely”; “Sometimes”; “Often” and “All times”.
